# Supplementary material
Source: PubMed Central journal article supplement (PMC516483)

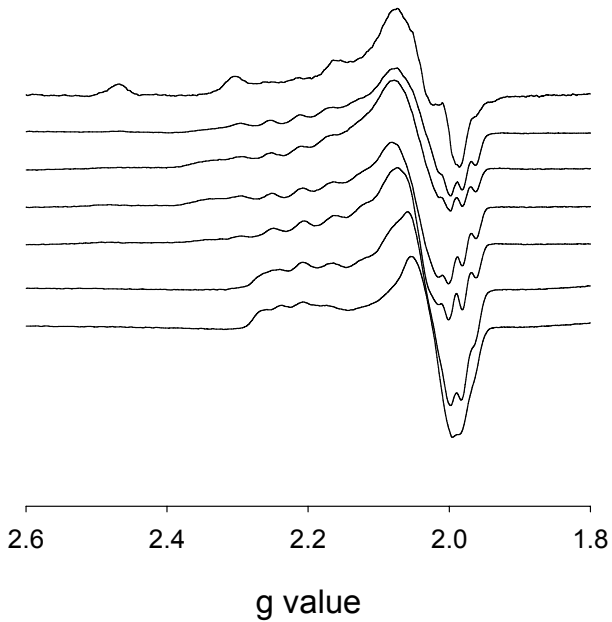

Supplement: pnas_101_35_12842__1.pdf [file pnas_101_35_12842__1.pdf]
